# Supplementary material for: Dynamic Visualization of TGF-β/SMAD3 Transcriptional Responses in Single Living Cells
Source: MDPI journal article supplement (doi:10.3390/cancers14102508), 2022-05-19
Supplement: s1 [file s1]

**Supplementary Table S1: Cloning primers**

| Cloning primers            | 5' to 3'                             |
|----------------------------|--------------------------------------|
| T7 FW                      | taatacgactcactataggg                 |
| CAGA <sub>12</sub> +MLP FW | tttatcgataggtaccgagctc               |
| CAGA+MLP + age1 REV        | cgtataccggtggatcag                   |
| D2 domain FW               | ggacgagctgtacaagaag                  |
| D2 domain REV              | ctgcagaattc ttacacattgatcctagcagaagc |
| eGFP FW                    | catggtcctgctggagttcgtg               |
| eGFP REV                   | cgtcgccgtccagctcgaccag               |
| PGK REV                    | cggtggtgtggaatgtgtg                  |

**Supplementary Table S2: rt-qPCR primers**

| Gene            | Forward (5'→ 3')         | Reverse (5'→ 3')       |
|-----------------|--------------------------|------------------------|
| <i>GFP</i>      | AAGCTGACCCTGAAGTTCATCTGC | TCCAGCAGGACCATGTGATC   |
| <i>dynGFP</i>   | GTCGAGCTGGACGGCGACGTA    | CACGAACTCCAGCAGGACCATG |
| <i>Smad7</i>    | TGGATGGCGTGTGGGTTTA      | TGGCGGACTTGATGAAGATG   |
| <i>Serpine1</i> | GCCAACAAGAGCCAATCACA     | AGGCAAGCAAGGGCTGAAG    |
| <i>Ctgf</i>     | GGCCTCTTCTGCGATTTCTG     | CCATCTTTGGCAGTGCACACT  |
| <i>Gapdh</i>    | CCAAGTCGGATGTGGAAATGG    | TGTCGCAAGTGGACAGTCTC   |
| <i>Hprt</i>     | TGGATACAGGCCAGACTTTGTT   | CAGATTCAACTTGCCTCATC   |
